# Supplementary material for: Metal-free homolytic hydrogen activation: a quest through density functional theory computations
Source: Royal Society of Chemistry journal article supplement (doi:10.1039/c6nj00557h), 2016-01-01
Supplement: c6nj00557h1.pdf [file c6nj00557h1.pdf]

## Supporting Information

# Metal-free Homolytic Hydrogen Activation: A Quest Through Density Functional Theory Computations

Chenggen Zhang,<sup>a</sup> Xiangying Lv,<sup>b</sup> Gang Lu<sup>c</sup> and Zhi-Xiang Wang<sup>d\*</sup>

<sup>a</sup> Department of Chemistry and Material Science, Langfang Teachers University, Langfang 065000, People's Republic of China

<sup>b</sup> School of Environment, Henan Normal University, Key Laboratory for Yellow River and Huai River Water Environment and Pollution Control, Ministry of Education, Henan Key Laboratory for Environmental Pollution Control, Xinxiang, Henan 453007, China.

<sup>c</sup> State Key Laboratory of Structural Chemistry, Fujian Institute of Research on the Structure of Matter, Chinese Academy of Sciences, Fuzhou, Fujian 350002, China

<sup>d</sup> School of Chemistry and Chemical Engineering, University of the Chinese Academy of Sciences, Beijing 100049, China. E-mail: zxwang@ucas.ac.cn (**Corresponding Author**)

### Contents

**SI1:** Frontier orbital energies (hartree) and gaps (hartree) of butadiene analogs

**SI2:** Frontier orbital energies (hartree) and gaps (hartree) of 1,3-dipoles

**SI3:** The activation barriers ( $\Delta G^\ddagger$  in kcal/mol) and exothermicities ( $\Delta G$  in kcal/mol) for H<sub>2</sub> activation.

**SI4:** Cartesian coordinates (Å) and energies of the H<sub>2</sub> activation transition states

**SI1: Frontier orbital energies (hartree) and gaps (hartree) of butadiene analogs**

|                  | <b>H<sub>2</sub></b> | <b>CC</b> | <b>SiSi</b> | <b>GeGe</b> | <b>NN</b> | <b>PP</b> | <b>AsAs</b>         | <b>OO</b> | <b>SS</b> | <b>SeSe</b> |
|------------------|----------------------|-----------|-------------|-------------|-----------|-----------|---------------------|-----------|-----------|-------------|
| LUMO             | 0.06036              | 0.00375   | -0.04347    | -0.04852    | -0.02614  | -0.07229  | -0.08773            | -0.07912  | -0.11419  | -0.13271    |
| HOMO             | -0.50294             | -0.30103  | -0.23059    | -0.2237     | -0.34502  | -0.28866  | -0.27611            | -0.34759  | -0.30581  | -0.28654    |
| HOMO-1           | -                    | -         | -           | -           | -0.361    | -0.33126  | -0.33278            | -0.41923  | -0.30763  | -0.30051    |
| HOMO-2           | -                    | -         | -           | -           | -0.38214  | -0.35551  | -0.361 <sup>a</sup> | -0.48233  | -0.35788  | -0.33429    |
| HOMO-LUMO gap    | -                    | 0.30478   | 0.18712     | 0.17518     | 0.31888   | 0.21637   | 0.18838             | 0.26847   | 0.19162   | 0.15383     |
| EOFMO-EUFMO gap  | -                    | 0.30478   | 0.18712     | 0.17518     | 0.356     | 0.21637   | 0.18838             | 0.40321   | 0.24369   | 0.20158     |
| EOFMO'-EUFMO gap | -                    | 0.30478   | 0.18712     | 0.17518     | 0.33486   | 0.21637   | 0.18838             | 0.34011   | 0.19162   | 0.15383     |

<sup>a</sup> Energy of HOMO-3.

**SI2:** Frontier orbital energies (hartree) and gaps (hartree) of 1,3-dipoles

|       | $\text{HC}\equiv\text{N}^+-\text{CH}_2^-$      | $\text{HC}\equiv\text{N}^+-\text{NH}^-$      | $\text{HC}\equiv\text{N}^+-\text{O}^-$      | $\text{N}\equiv\text{N}^+-\text{CH}_2^-$ | $\text{N}\equiv\text{N}^+-\text{NH}^-$ | $\text{N}\equiv\text{N}^+-\text{O}^-$ |
|-------|------------------------------------------------|----------------------------------------------|---------------------------------------------|------------------------------------------|----------------------------------------|---------------------------------------|
| EUFMO | 0.01157                                        | 0.00906                                      | 0.03523                                     | 0.0436                                   | 0.00661                                | 0.02781                               |
| EOFMO | -0.26809                                       | -0.29889                                     | -0.35022                                    | -0.28266                                 | -0.40426                               | -0.42387                              |
| Gap   | 0.27966                                        | 0.30795                                      | 0.38545                                     | 0.32626                                  | 0.41087                                | 0.45168                               |
|       | $\text{H}_2\text{C}=\text{NH}^+-\text{CH}_2^-$ | $\text{H}_2\text{C}=\text{NH}^+-\text{NH}^-$ | $\text{H}_2\text{C}=\text{NH}^+-\text{O}^-$ | $\text{HN}=\text{NH}^+-\text{NH}^-$      | $\text{HN}=\text{NH}^+-\text{O}^-$     | $\text{O}=\text{NH}^+-\text{O}^-$     |
| EUFMO | 0.02086                                        | 0.01249                                      | -0.0024                                     | -0.00084                                 | -0.02074                               | -0.04633                              |
| EOFMO | -0.21093                                       | -0.25241                                     | -0.30342                                    | -0.30019                                 | -0.3567                                | -0.41796                              |
| Gap   | 0.23179                                        | 0.2649                                       | 0.30102                                     | 0.29935                                  | 0.33596                                | 0.37163                               |
|       | $\text{H}_2\text{C}=\text{O}^+-\text{CH}_2^-$  | $\text{H}_2\text{C}=\text{O}^+-\text{NH}^-$  | $\text{H}_2\text{C}=\text{O}^+-\text{O}^-$  | $\text{HN}=\text{O}^+-\text{NH}^-$       | $\text{HN}=\text{O}^+-\text{O}^-$      | $\text{O}=\text{O}^+-\text{O}^-$      |
| EUFMO | -0.01514                                       | -0.03596                                     | -0.06138                                    | -0.06285                                 | -0.09727                               | -0.14125                              |
| EOFMO | -0.22653                                       | -0.27051                                     | -0.32629                                    | -0.32013                                 | -0.3791                                | -0.44385                              |
| Gap   | 0.21139                                        | 0.23455                                      | 0.26491                                     | 0.25728                                  | 0.28183                                | 0.3026                                |
|       | $\text{H}_2\text{C}=\text{S}^+-\text{CH}_2^-$  | $\text{H}_2\text{C}=\text{S}^+-\text{NH}^-$  | $\text{H}_2\text{C}=\text{S}^+-\text{O}^-$  | $\text{HN}=\text{S}^+-\text{NH}^-$       | $\text{HN}=\text{S}^+-\text{O}^-$      | $\text{O}=\text{S}^+-\text{O}^-$      |
| EUFMO | -0.02165                                       | -0.03757                                     | -0.05326                                    | -0.05589                                 | -0.07507                               | -0.09881                              |
| EOFMO | -0.247                                         | -0.28755                                     | -0.33571                                    | -0.33577                                 | -0.39115                               | -0.45487                              |
| Gap   | 0.22535                                        | 0.24998                                      | 0.28245                                     | 0.27988                                  | 0.31608                                | 0.35606                               |

**SI3:** The activation barriers ( $\Delta G^\ddagger$  in kcal/mol) and exothermicities ( $\Delta G$  in kcal/mol) for  $\text{H}_2$  activation.

|                                |                     | CC    | SiSi  | GeGe  | NN    | PP    | AsAs  | OO    | SS    | SeSe  |
|--------------------------------|---------------------|-------|-------|-------|-------|-------|-------|-------|-------|-------|
| 1,4- $\text{H}_2$<br>additions | $\Delta G^\ddagger$ | 38.9  | 9.6   | 8.1   | 42.2  | 19.1  | 14.5  | 56.8  | 21.7  | 14.1  |
|                                | $\Delta G$          | -25.7 | -53.6 | -51.5 | -28.7 | -21.0 | -21.6 | -19.5 | -27.8 | -30.4 |
| 1,2- $\text{H}_2$<br>additions | $\Delta G^\ddagger$ | 91.1  | 60.7  | 51.1  | 85.6  | 73.7  | 66.7  | 74.3  | 63.4  | 48.5  |
|                                | $\Delta G$          | -19.8 | -35.7 | 21.6  | -22.7 | -20.5 | -22.7 | -20.3 | -24.8 | -29.6 |

## SI4: Cartesian coordinates (Å) and energies of the H<sub>2</sub> activation transition states

### CC

M05-2X SCF energy: -157.122216 a.u.  
M05-2X enthalpy: -157.015468 a.u.  
M05-2X free energy: -157.046693 a.u.

#### Cartesian coordinates

| ATOM | X | Y           | Z           |             |
|------|---|-------------|-------------|-------------|
| C    |   | 0.06047900  | 0.71661000  | 0.69703600  |
| C    |   | 0.06047900  | 0.71661000  | -0.69703600 |
| C    |   | 0.06047900  | -0.48527600 | 1.39161000  |
| H    |   | 0.69614700  | -1.30301400 | 1.07790900  |
| H    |   | -0.18782100 | -0.48977900 | 2.44521500  |
| C    |   | 0.06047900  | -0.48527600 | -1.39161000 |
| H    |   | -0.18782100 | -0.48977900 | -2.44521500 |
| H    |   | 0.69614700  | -1.30301400 | -1.07790900 |
| H    |   | -1.01241600 | -1.21971300 | -0.45220600 |
| H    |   | -1.01241600 | -1.21971300 | 0.45220600  |
| H    |   | -0.22165200 | 1.62450200  | -1.21400600 |
| H    |   | -0.22165200 | 1.62450200  | 1.21400600  |

### NN

M05-2X SCF energy: -189.207852 a.u.  
M05-2X enthalpy: -189.125096 a.u.  
M05-2X free energy: -189.156067 a.u.

#### Cartesian coordinates

| ATOM | X | Y           | Z           |             |
|------|---|-------------|-------------|-------------|
| C    |   | -0.70651600 | 0.65583800  | -0.01580200 |
| C    |   | 0.70651600  | 0.65583800  | -0.01580200 |
| N    |   | -1.29412000 | -0.50818700 | -0.15685500 |
| H    |   | -2.26015500 | -0.47611400 | 0.16143900  |
| N    |   | 1.29412000  | -0.50818700 | -0.15685500 |
| H    |   | 2.26015500  | -0.47611400 | 0.16143900  |
| H    |   | 0.45703300  | -1.43724600 | 0.67366700  |
| H    |   | -0.45703400 | -1.43724500 | 0.67366500  |
| H    |   | 1.22374500  | 1.53564000  | 0.35769100  |
| H    |   | -1.22374500 | 1.53564000  | 0.35769100  |

### OO

M05-2X SCF energy: -228.940349 a.u.  
M05-2X enthalpy: -228.883476 a.u.

M05-2X free energy: -228.914091 a.u.

Cartesian coordinates

| ATOM | X | Y           | Z           |             |
|------|---|-------------|-------------|-------------|
| C    |   | -0.71046700 | 0.63186600  | -0.02546600 |
| C    |   | 0.71046700  | 0.63186500  | -0.02546600 |
| O    |   | -1.27362700 | -0.48804300 | -0.09960300 |
| O    |   | 1.27362700  | -0.48804300 | -0.09960300 |
| H    |   | -0.46584400 | -1.38778900 | 0.59460600  |
| H    |   | 0.46584400  | -1.38778900 | 0.59460700  |
| H    |   | 1.24948800  | 1.50093900  | 0.35501300  |
| H    |   | -1.24948800 | 1.50093800  | 0.35501300  |

**SiSi**

M05-2X SCF energy: -659.858649 a.u.

M05-2X enthalpy: -659.772119 a.u.

M05-2X free energy: -659.809707 a.u.

Cartesian coordinates

| ATOM | X | Y           | Z           |             |
|------|---|-------------|-------------|-------------|
| C    |   | 0.70563500  | 0.99898300  | 0.00303500  |
| C    |   | -0.70563700 | 0.99897500  | 0.00290900  |
| H    |   | -0.38523800 | -1.23699900 | 1.62549600  |
| H    |   | 0.38559000  | -1.23703700 | 1.62563900  |
| H    |   | -1.18404300 | 1.94469800  | 0.24281500  |
| H    |   | 1.18402600  | 1.94467500  | 0.24310600  |
| Si   |   | 1.81269600  | -0.35372700 | -0.08699200 |
| H    |   | 3.26118100  | -0.08478600 | -0.01488600 |
| H    |   | 1.44403200  | -1.66437700 | -0.65428800 |
| Si   |   | -1.81272200 | -0.35376300 | -0.08686400 |
| H    |   | -3.26120600 | -0.08460100 | -0.01555700 |
| H    |   | -1.44397400 | -1.66446700 | -0.65399300 |

**PP**

M05-2X SCF energy: -762.414228 a.u.

M05-2X enthalpy: -762.343308 a.u.

M05-2X free energy: -762.377703 a.u.

Cartesian coordinates

| ATOM | X | Y           | Z           |             |
|------|---|-------------|-------------|-------------|
| C    |   | -0.08505900 | 1.00840100  | 0.69273300  |
| C    |   | -0.08505900 | 1.00840100  | -0.69273300 |
| H    |   | 1.28279400  | -1.09299800 | -0.43341200 |

|   |             |             |             |
|---|-------------|-------------|-------------|
| H | 1.28279400  | -1.09299800 | 0.43341200  |
| P | -0.08505900 | -0.46790400 | -1.61460300 |
| H | 0.43405100  | 0.10763700  | -2.80981200 |
| P | -0.08505900 | -0.46790400 | 1.61460300  |
| H | 0.43405100  | 0.10763700  | 2.80981200  |
| H | 0.06938800  | 1.95351200  | -1.19818100 |
| H | 0.06938800  | 1.95351200  | 1.19818100  |

## SS

|                     |             |      |
|---------------------|-------------|------|
| M05-2X SCF energy:  | -874.901894 | a.u. |
| M05-2X enthalpy:    | -874.848518 | a.u. |
| M05-2X free energy: | -874.88206  | a.u. |

## Cartesian coordinates

| ATOM | X           | Y           | Z           |
|------|-------------|-------------|-------------|
| C    | -0.70274300 | 0.97332700  | 0.02374500  |
| C    | 0.70274300  | 0.97332700  | 0.02374500  |
| H    | -0.41735700 | -1.32304700 | 1.05197900  |
| H    | 0.41735700  | -1.32304700 | 1.05197700  |
| H    | 1.18528900  | 1.89280200  | 0.33776900  |
| H    | -1.18528900 | 1.89280200  | 0.33776900  |
| S    | 1.62215700  | -0.40060700 | -0.09576300 |
| S    | -1.62215700 | -0.40060700 | -0.09576400 |

## GeGe

|                     |              |      |
|---------------------|--------------|------|
| M06-2X SCF energy:  | -4234.786751 | a.u. |
| M06-2X enthalpy:    | -4234.703551 | a.u. |
| M06-2X free energy: | -4234.745592 | a.u. |

## Cartesian coordinates

| ATOM | X           | Y           | Z           |
|------|-------------|-------------|-------------|
| C    | 0.70623100  | 1.19683900  | 0.02566900  |
| C    | -0.70147900 | 1.19555100  | 0.00919900  |
| H    | -0.39522200 | -1.00801000 | 1.81566900  |
| H    | 0.36695800  | -1.07268100 | 1.77735900  |
| H    | -1.18475700 | 2.14740100  | 0.21926900  |
| H    | 1.18513300  | 2.14455800  | 0.26199900  |
| Ge   | 1.86672900  | -0.21111300 | -0.05070100 |
| H    | 3.36949000  | 0.06241500  | 0.01839900  |
| H    | 1.47492800  | -1.58845300 | -0.58962100 |
| Ge   | -1.86698100 | -0.21133800 | -0.04655100 |
| H    | -3.36768000 | 0.08395400  | -0.06206100 |
| H    | -1.46933300 | -1.60508800 | -0.53815100 |

**GeGe**

M05-2X SCF energy: -4234.662015 a.u.  
M05-2X enthalpy: -4234.577818 a.u.  
M05-2X free energy: -4234.620417 a.u.

## Cartesian coordinates

| ATOM | X | Y           | Z           |             |
|------|---|-------------|-------------|-------------|
| C    |   | 0.69096300  | 1.17548300  | -0.02026100 |
| C    |   | -0.71186700 | 1.15342300  | 0.19836900  |
| H    |   | -0.21662800 | -0.95473700 | 2.27182900  |
| H    |   | 0.50728200  | -0.98299700 | 2.44832900  |
| H    |   | -1.16722700 | 2.06887400  | 0.56072900  |
| H    |   | 1.16379300  | 2.15188300  | -0.02680100 |
| Ge   |   | 1.86493200  | -0.20470800 | -0.06329100 |
| H    |   | 3.30656200  | 0.06252100  | -0.47906100 |
| H    |   | 1.43169200  | -1.66581800 | -0.03210100 |
| Ge   |   | -1.86896800 | -0.20299600 | -0.10458100 |
| H    |   | -3.32400800 | -0.09857500 | 0.32834900  |
| H    |   | -1.44690800 | -1.50806600 | -0.76802100 |

**AsAs**

M05-2X SCF energy: -4551.259444 a.u.  
M05-2X enthalpy: -4551.190105 a.u.  
M05-2X free energy: -4551.227543 a.u.

## Cartesian coordinates

| ATOM | X | Y           | Z           |             |
|------|---|-------------|-------------|-------------|
| C    |   | -0.69043400 | 1.26708700  | 0.01624000  |
| C    |   | 0.69043500  | 1.26708800  | 0.01624000  |
| H    |   | 0.41445400  | -0.97181500 | 1.40105500  |
| H    |   | -0.41445400 | -0.97181600 | 1.40105400  |
| H    |   | 1.19745900  | 2.20537500  | 0.20304700  |
| H    |   | -1.19746100 | 2.20537500  | 0.20304700  |
| As   |   | 1.71077100  | -0.27944000 | -0.06591100 |
| H    |   | 2.97181600  | 0.38541900  | 0.47352800  |
| As   |   | -1.71077100 | -0.27943900 | -0.06591100 |
| H    |   | -2.97181600 | 0.38541700  | 0.47352800  |

**SeSe**

M05-2X SCF energy: -4881.442013 a.u.  
M05-2X enthalpy: -4881.389428 a.u.

M05-2X free energy: -4881.426139 a.u.

Cartesian coordinates

| ATOM | X | Y           | Z           |             |
|------|---|-------------|-------------|-------------|
| C    |   | -0.70184400 | 1.21711300  | 0.05676400  |
| C    |   | 0.70184400  | 1.21711300  | 0.05676400  |
| H    |   | -0.39791000 | -1.16059900 | 1.36678200  |
| H    |   | 0.39790800  | -1.16059800 | 1.36677800  |
| H    |   | 1.18422200  | 2.15264700  | 0.31511800  |
| H    |   | -1.18422200 | 2.15264700  | 0.31511900  |
| Se   |   | 1.73452200  | -0.24396300 | -0.05948500 |
| Se   |   | -1.73452200 | -0.24396300 | -0.05948500 |

**trans-1**

M05-2X SCF energy: -2166.699545 a.u.

M05-2X enthalpy: -2165.747398 a.u.

M05-2X free energy: -2165.876096 a.u.

Cartesian coordinates

| ATOM | X | Y           | Z           |             |
|------|---|-------------|-------------|-------------|
| C    |   | -0.71628000 | -0.00360500 | -0.03469800 |
| H    |   | -1.26617700 | 0.01480700  | 0.90419500  |
| C    |   | 0.71627000  | 0.00410800  | 0.03450400  |
| H    |   | 1.26619200  | -0.01425700 | -0.90437200 |
| P    |   | -1.52984100 | -0.03818800 | -1.51380300 |
| P    |   | 1.52977600  | 0.03841800  | 1.51364700  |
| C    |   | -3.29403800 | -0.03239200 | -0.91619300 |
| C    |   | -5.78234700 | -0.02096400 | 0.41560500  |
| C    |   | -3.95085200 | -1.25750700 | -0.63733800 |
| C    |   | -3.94914400 | 1.20322800  | -0.65443000 |
| C    |   | -5.16632200 | 1.16439900  | 0.02550600  |
| C    |   | -5.17428100 | -1.21034700 | 0.04264100  |
| H    |   | -5.66477200 | 2.09041600  | 0.26331500  |
| H    |   | -5.66816700 | -2.13346800 | 0.29002400  |
| C    |   | 3.29400900  | 0.03248500  | 0.91614100  |
| C    |   | 5.78240700  | 0.02084700  | -0.41551600 |
| C    |   | 3.95100200  | 1.25752900  | 0.63742500  |
| C    |   | 3.94899400  | -1.20321200 | 0.65433900  |
| C    |   | 5.16619200  | -1.16447900 | -0.02554300 |
| C    |   | 5.17447900  | 1.21026700  | -0.04248200 |
| H    |   | 5.66453400  | -2.09054100 | -0.26342400 |
| H    |   | 5.66850200  | 2.13334800  | -0.28974500 |
| C    |   | 3.43405600  | 2.65411200  | 1.06959800  |
| C    |   | 7.10235600  | -0.03092800 | -1.18576200 |



|   |             |             |             |
|---|-------------|-------------|-------------|
| C | 3.43363800  | -2.59057600 | 1.11638700  |
| C | -3.43377400 | -2.65405600 | -1.06946200 |
| C | -3.43398600 | 2.59061600  | -1.11658400 |
| C | -7.10228000 | 0.03068300  | 1.18589200  |
| C | 2.23436800  | 3.12467800  | 0.22478500  |
| H | 1.33298500  | 2.55001500  | 0.41908700  |
| H | 2.46723600  | 3.04761600  | -0.83974900 |
| H | 2.02262900  | 4.17242200  | 0.45428200  |
| C | 3.07637500  | 2.66405500  | 2.56709000  |
| H | 2.24943300  | 2.00061200  | 2.81722800  |
| H | 2.77890100  | 3.67376200  | 2.86080000  |
| H | 3.94184800  | 2.37095200  | 3.16491100  |
| C | 4.51816200  | 3.73554600  | 0.90105800  |
| H | 5.43893100  | 3.47530900  | 1.42681100  |
| H | 4.14048100  | 4.66794300  | 1.32396000  |
| H | 4.75047300  | 3.92713200  | -0.14822900 |
| C | 7.63198400  | 1.36537200  | -1.52693100 |
| H | 7.84064200  | 1.94710500  | -0.62635300 |
| H | 6.92513600  | 1.92171000  | -2.14635000 |
| H | 8.56504300  | 1.26957500  | -2.08597200 |
| C | 8.16442500  | -0.75089400 | -0.33810600 |
| H | 8.32085200  | -0.22649800 | 0.60653900  |
| H | 9.11389400  | -0.78293800 | -0.87863200 |
| H | 7.87121800  | -1.77724000 | -0.11204400 |
| C | 6.89399900  | -0.79826300 | -2.50177400 |
| H | 6.56014700  | -1.82133200 | -2.32178000 |
| H | 7.83233600  | -0.84242500 | -3.06044200 |
| H | 6.14496900  | -0.30135200 | -3.12142700 |
| C | 4.52028500  | -3.67239200 | 0.96896400  |
| H | 5.44223600  | -3.39659600 | 1.48479200  |
| H | 4.74873300  | -3.88706600 | -0.07676900 |
| H | 4.14749800  | -4.59615800 | 1.41449500  |
| C | 3.07937400  | -2.56796800 | 2.61450000  |
| H | 3.94520300  | -2.25899300 | 3.20379100  |
| H | 2.78544800  | -3.57170400 | 2.93132500  |
| H | 2.25083400  | -1.90149900 | 2.85155900  |
| C | 2.23298800  | -3.08321400 | 0.28552700  |
| H | 1.32888500  | -2.51123800 | 0.47434500  |
| H | 2.02916500  | -4.12810200 | 0.53442100  |
| H | 2.46025400  | -3.02365200 | -0.78134600 |
| C | -4.51772000 | -3.73562200 | -0.90071000 |
| H | -4.74985500 | -3.92719100 | 0.14861700  |
| H | -4.13998800 | -4.66798400 | -1.32363500 |
| H | -5.43860300 | -3.47552600 | -1.42632700 |
| C | -2.23391300 | -3.12438000 | -0.22474000 |

|   |             |             |             |
|---|-------------|-------------|-------------|
| H | -2.46664300 | -3.04720800 | 0.83981400  |
| H | -1.33265900 | -2.54960500 | -0.41925100 |
| H | -2.02205200 | -4.17211500 | -0.45416300 |
| C | -3.07621100 | -2.66404700 | -2.56697600 |
| H | -2.24942500 | -2.00044900 | -2.81724000 |
| H | -3.94178200 | -2.37116300 | -3.16477400 |
| H | -2.77854300 | -3.67371700 | -2.86063700 |
| C | -6.89404900 | 0.79825800  | 2.50178600  |
| H | -6.56043900 | 1.82138100  | 2.32165700  |
| H | -6.14487800 | 0.30161100  | 3.12147800  |
| H | -7.83236300 | 0.84227300  | 3.06051300  |
| C | -8.16450500 | 0.75029400  | 0.33814300  |
| H | -7.87150400 | 1.77665900  | 0.11191500  |
| H | -9.11398600 | 0.78223500  | 0.87866100  |
| H | -8.32083500 | 0.22574900  | -0.60643400 |
| C | -7.63161200 | -1.36567500 | 1.52729900  |
| H | -6.92457800 | -1.92180600 | 2.14668600  |
| H | -7.84025800 | -1.94755200 | 0.62682300  |
| H | -8.56462500 | -1.26998300 | 2.08642700  |
| C | -3.07970700 | 2.56793600  | -2.61469300 |
| H | -3.94549900 | 2.25878700  | -3.20395500 |
| H | -2.25106800 | 1.90157100  | -2.85169500 |
| H | -2.78592000 | 3.57167900  | -2.93161500 |
| C | -4.52079300 | 3.67227400  | -0.96923400 |
| H | -5.44274000 | 3.39624800  | -1.48495400 |
| H | -4.14818000 | 4.59604100  | -1.41491400 |
| H | -4.74919800 | 3.88704700  | 0.07648200  |
| C | -2.23342300 | 3.08348300  | -0.28573700 |
| H | -2.46074300 | 3.02403800  | 0.78113500  |
| H | -2.02969900 | 4.12836200  | -0.53475600 |
| H | -1.32923300 | 2.51160200  | -0.47443800 |

### TS1

|                     |              |      |
|---------------------|--------------|------|
| M05-2X SCF energy:  | -2166.681683 | a.u. |
| M05-2X enthalpy:    | -2165.730053 | a.u. |
| M05-2X free energy: | -2165.861839 | a.u. |

### Cartesian coordinates

| ATOM | X           | Y           | Z           |
|------|-------------|-------------|-------------|
| C    | 0.72725200  | -0.09225100 | 0.01495700  |
| H    | 1.27571400  | -0.65640500 | 0.76778100  |
| C    | -0.74991700 | -0.08504200 | 0.09990100  |
| H    | -1.29736400 | -0.75297600 | -0.56365000 |
| P    | 1.55213100  | 0.73175000  | -1.18487800 |

|   |             |             |             |
|---|-------------|-------------|-------------|
| P | -1.58167300 | 0.90871900  | 1.15777000  |
| C | 3.31107500  | 0.31031900  | -0.72662400 |
| C | 5.77547100  | -0.56600100 | 0.33432700  |
| C | 4.02156300  | 1.13568400  | 0.18060100  |
| C | 3.90578200  | -0.88579200 | -1.21635800 |
| C | 5.11234500  | -1.29450600 | -0.64875700 |
| C | 5.23033500  | 0.65541400  | 0.70054900  |
| H | 5.56272900  | -2.21520000 | -0.98460600 |
| H | 5.76240900  | 1.25728000  | 1.41620700  |
| C | -3.33270500 | 0.42158200  | 0.73164000  |
| C | -5.72909700 | -0.66215300 | -0.28887700 |
| C | -3.94342700 | -0.67748800 | 1.38505100  |
| C | -4.00569600 | 1.07899700  | -0.33545100 |
| C | -5.17446400 | 0.49666700  | -0.82479200 |
| C | -5.11951800 | -1.20166200 | 0.83423800  |
| H | -5.68253700 | 0.95927200  | -1.65608900 |
| H | -5.57395700 | -2.06052200 | 1.29714800  |
| C | -3.42677700 | -1.32149000 | 2.69713200  |
| C | -6.99340600 | -1.25445900 | -0.91184100 |
| C | -3.56102000 | 2.42386700  | -0.96584400 |
| C | 3.58033800  | 2.55658200  | 0.61813500  |
| C | 3.33561300  | -1.75179900 | -2.36913800 |
| C | 7.07851900  | -1.10437200 | 0.92673100  |
| C | -2.22024800 | -2.24756400 | 2.45802100  |
| H | -1.33494200 | -1.70277600 | 2.14095700  |
| H | -2.45960200 | -2.98886100 | 1.69210100  |
| H | -1.98280100 | -2.77671800 | 3.38486700  |
| C | -3.07809800 | -0.24310600 | 3.73867500  |
| H | -2.23213700 | 0.37922400  | 3.44997900  |
| H | -2.81255700 | -0.72462900 | 4.68291800  |
| H | -3.93663300 | 0.40883800  | 3.91280100  |
| C | -4.51088400 | -2.19330700 | 3.35933500  |
| H | -5.43983100 | -1.63974200 | 3.50982100  |
| H | -4.14493300 | -2.51440500 | 4.33607200  |
| H | -4.72645700 | -3.09629500 | 2.78525000  |
| C | -7.43658500 | -2.54318400 | -0.21243700 |
| H | -7.69588500 | -2.36490300 | 0.83342000  |
| H | -6.65793800 | -3.30808800 | -0.25400400 |
| H | -8.32337800 | -2.93797600 | -0.71256500 |
| C | -8.14032700 | -0.23507200 | -0.81109100 |
| H | -8.34600200 | 0.00729600  | 0.23338900  |
| H | -9.04857300 | -0.64931600 | -1.25631300 |
| H | -7.90038000 | 0.69232300  | -1.33348500 |
| C | -6.72859000 | -1.58032600 | -2.39108000 |
| H | -6.45413400 | -0.68875700 | -2.95679300 |

|   |             |             |             |
|---|-------------|-------------|-------------|
| H | -7.62707500 | -2.00505300 | -2.84578700 |
| H | -5.91700900 | -2.30443900 | -2.48541200 |
| C | -4.70074400 | 3.05982700  | -1.78536200 |
| H | -5.61680600 | 3.15882300  | -1.19921300 |
| H | -4.92120400 | 2.49737200  | -2.69457900 |
| H | -4.38616700 | 4.05779900  | -2.09515200 |
| C | -3.21681900 | 3.45550200  | 0.12338300  |
| H | -4.05772300 | 3.58115200  | 0.80870400  |
| H | -3.00679900 | 4.41916500  | -0.34676500 |
| H | -2.33713900 | 3.18949300  | 0.70778300  |
| C | -2.37901100 | 2.25570100  | -1.93865400 |
| H | -1.45536500 | 1.98497400  | -1.43452400 |
| H | -2.21184000 | 3.19771400  | -2.46767900 |
| H | -2.60432800 | 1.48366500  | -2.67812400 |
| C | 4.73143000  | 3.31582300  | 1.30570300  |
| H | 4.98515800  | 2.89033400  | 2.27835000  |
| H | 4.40826700  | 4.34357800  | 1.47923500  |
| H | 5.62949100  | 3.34339400  | 0.68527100  |
| C | 2.42547100  | 2.52150900  | 1.63691600  |
| H | 2.67832100  | 1.86507000  | 2.47281200  |
| H | 1.49216500  | 2.17463300  | 1.20174800  |
| H | 2.26189600  | 3.52831600  | 2.03062300  |
| C | 3.19567000  | 3.41557400  | -0.60034000 |
| H | 2.31072400  | 3.05433700  | -1.12204800 |
| H | 4.02136300  | 3.45464700  | -1.31392700 |
| H | 2.97669800  | 4.43335700  | -0.26840400 |
| C | 6.81940100  | -2.48112700 | 1.56069700  |
| H | 6.45492700  | -3.19998400 | 0.82535900  |
| H | 6.07637100  | -2.40379400 | 2.35684900  |
| H | 7.74528300  | -2.87498800 | 1.98745700  |
| C | 8.12892800  | -1.24634200 | -0.18742800 |
| H | 7.79813900  | -1.93583900 | -0.96570900 |
| H | 9.06431500  | -1.62932100 | 0.22859400  |
| H | 8.32684600  | -0.27877400 | -0.65274100 |
| C | 7.65044600  | -0.18276100 | 2.00827800  |
| H | 6.94587800  | -0.04821100 | 2.83194000  |
| H | 7.90832000  | 0.79909100  | 1.60537800  |
| H | 8.56175000  | -0.62657100 | 2.41438100  |
| C | 2.93477600  | -0.87937100 | -3.57226900 |
| H | 3.78369100  | -0.27923900 | -3.90648600 |
| H | 2.10510100  | -0.20621600 | -3.36155300 |
| H | 2.62118800  | -1.52448600 | -4.39661800 |
| C | 4.39507600  | -2.73094400 | -2.91118700 |
| H | 5.31462800  | -2.21660500 | -3.19758200 |
| H | 3.98917800  | -3.21928100 | -3.79868100 |

|   |            |             |             |
|---|------------|-------------|-------------|
| H | 4.63633600 | -3.51761300 | -2.19414100 |
| C | 2.14809800 | -2.62104100 | -1.91453700 |
| H | 2.42428900 | -3.20425400 | -1.03308400 |
| H | 1.88349300 | -3.31609100 | -2.71604200 |
| H | 1.26842700 | -2.03118200 | -1.67203800 |

**cis-1**

|                     |              |      |
|---------------------|--------------|------|
| M05-2X SCF energy:  | -2166.695547 | a.u. |
| M05-2X enthalpy:    | -2165.742649 | a.u. |
| M05-2X free energy: | -2165.872566 | a.u. |

Cartesian coordinates

| ATOM | X           | Y           | Z           |
|------|-------------|-------------|-------------|
| C    | 0.71611300  | -0.04723200 | 0.38140600  |
| H    | 1.26331000  | 0.16122400  | 1.29763000  |
| C    | -0.71658400 | 0.08922500  | 0.38563200  |
| H    | -1.25950200 | -0.13323800 | 1.30113700  |
| P    | 1.52756300  | -0.57020400 | -1.00646500 |
| P    | -1.53483800 | 0.62919900  | -0.99165100 |
| C    | 3.28741900  | -0.27274300 | -0.47448000 |
| C    | 5.75819000  | 0.23841200  | 0.78687400  |
| C    | 3.82185300  | 1.03946500  | -0.47980300 |
| C    | 4.05846000  | -1.35518100 | 0.03269900  |
| C    | 5.26496900  | -1.05805100 | 0.66495100  |
| C    | 5.03894200  | 1.25640600  | 0.17917300  |
| H    | 5.85170700  | -1.85986600 | 1.08395700  |
| H    | 5.43940700  | 2.25459900  | 0.21405500  |
| C    | -3.29189700 | 0.31587400  | -0.45952100 |
| C    | -5.75933700 | -0.22823300 | 0.79493900  |
| C    | -4.06898000 | 1.38085300  | 0.06090800  |
| C    | -3.81720200 | -1.00544400 | -0.48275700 |
| C    | -5.02665200 | -1.23503800 | 0.17328800  |
| C    | -5.27990200 | 1.06964700  | 0.69115300  |
| H    | -5.42676200 | -2.23627700 | 0.19962000  |
| H    | -5.86555700 | 1.86504600  | 1.11768100  |
| C    | -3.68323100 | 2.87751900  | -0.04858200 |
| C    | -7.06008600 | -0.57826900 | 1.51881400  |
| C    | -3.18138000 | -2.20549900 | -1.23415700 |
| C    | 3.19114600  | 2.25789300  | -1.20588000 |
| C    | 3.66408000  | -2.84674500 | -0.10426300 |
| C    | 7.07060500  | 0.47962500  | 1.53373500  |
| C    | -2.48963400 | 3.24215000  | 0.85473600  |
| H    | -1.55649900 | 2.79175100  | 0.52483600  |
| H    | -2.68017200 | 2.92031000  | 1.88122700  |

|   |             |             |             |
|---|-------------|-------------|-------------|
| H | -2.35679400 | 4.32733500  | 0.85438200  |
| C | -3.38844200 | 3.25219700  | -1.51292100 |
| H | -2.52626600 | 2.72913800  | -1.92321900 |
| H | -3.18029800 | 4.32321900  | -1.57762700 |
| H | -4.25451900 | 3.03103300  | -2.14015500 |
| C | -4.83806400 | 3.79634900  | 0.38941800  |
| H | -5.75147500 | 3.60093100  | -0.17576700 |
| H | -4.54263600 | 4.83038900  | 0.20357100  |
| H | -5.05458100 | 3.70646600  | 1.45576300  |
| C | -7.73899200 | 0.65370300  | 2.12521400  |
| H | -8.01631600 | 1.37843100  | 1.35646000  |
| H | -7.09472200 | 1.14814600  | 2.85544600  |
| H | -8.65228900 | 0.34539900  | 2.63827400  |
| C | -8.04353800 | -1.22716800 | 0.53059800  |
| H | -8.26933700 | -0.54367100 | -0.29022200 |
| H | -8.97674700 | -1.47431600 | 1.04306600  |
| H | -7.63970500 | -2.14690600 | 0.10479100  |
| C | -6.75493700 | -1.56627600 | 2.65700800  |
| H | -6.30952300 | -2.48793000 | 2.27935500  |
| H | -7.67706900 | -1.82660700 | 3.18274700  |
| H | -6.06079100 | -1.12320300 | 3.37378200  |
| C | -4.22236100 | -3.31885900 | -1.46952100 |
| H | -5.12556900 | -2.93433000 | -1.94763100 |
| H | -4.50089900 | -3.82826900 | -0.54543200 |
| H | -3.78180200 | -4.07004700 | -2.12699800 |
| C | -2.69579500 | -1.79865200 | -2.63704300 |
| H | -3.49591600 | -1.30704500 | -3.19454200 |
| H | -2.39124300 | -2.69375800 | -3.18449600 |
| H | -1.83097600 | -1.13490200 | -2.61985100 |
| C | -2.02804200 | -2.85602500 | -0.44600700 |
| H | -1.14170700 | -2.22677100 | -0.40966800 |
| H | -1.75268200 | -3.79847400 | -0.92713800 |
| H | -2.34218000 | -3.07399500 | 0.57736300  |
| C | 4.24304800  | 3.36141900  | -1.44125900 |
| H | 4.54128700  | 3.85544700  | -0.51508600 |
| H | 3.80302700  | 4.12665500  | -2.08274200 |
| H | 5.13452000  | 2.97187300  | -1.93683500 |
| C | 2.05914600  | 2.90958100  | -0.38853100 |
| H | 2.39444600  | 3.11254600  | 0.63120600  |
| H | 1.16844400  | 2.28672600  | -0.34299700 |
| H | 1.78290400  | 3.86013600  | -0.85298800 |
| C | 2.67682900  | 1.88027900  | -2.60666900 |
| H | 1.79642300  | 1.23742600  | -2.58609000 |
| H | 3.45704700  | 1.37728100  | -3.18196100 |
| H | 2.38579700  | 2.78907700  | -3.13862100 |

|   |            |             |             |
|---|------------|-------------|-------------|
| C | 6.92563200 | -0.00592700 | 2.98545900  |
| H | 6.69211900 | -1.07073700 | 3.03196300  |
| H | 6.12783500 | 0.53879000  | 3.49407200  |
| H | 7.85952400 | 0.15967300  | 3.52863400  |
| C | 8.20500900 | -0.29861400 | 0.84638900  |
| H | 8.01428900 | -1.37295400 | 0.84689800  |
| H | 9.14815500 | -0.12308900 | 1.37014000  |
| H | 8.31882800 | 0.02541000  | -0.18990600 |
| C | 7.45909500 | 1.96111900  | 1.56453800  |
| H | 6.69396600 | 2.56501300  | 2.05726200  |
| H | 7.62189200 | 2.35559600  | 0.55915500  |
| H | 8.38990000 | 2.07709300  | 2.12358700  |
| C | 3.37367100 | -3.19267100 | -1.57650800 |
| H | 4.24345700 | -2.96421600 | -2.19592700 |
| H | 2.51569600 | -2.65758300 | -1.98012000 |
| H | 3.16039600 | -4.26120900 | -1.66211400 |
| C | 4.81256300 | -3.77841400 | 0.32223100  |
| H | 5.72901900 | -3.57728700 | -0.23611100 |
| H | 4.51342300 | -4.80786100 | 0.11789300  |
| H | 5.02479800 | -3.70723400 | 1.39092900  |
| C | 2.46465100 | -3.22156100 | 0.78718800  |
| H | 2.65024000 | -2.91505200 | 1.81924900  |
| H | 2.32946400 | -4.30630100 | 0.77021600  |
| H | 1.53415600 | -2.76464000 | 0.45893100  |

## TS2

|                     |              |      |
|---------------------|--------------|------|
| M05-2X SCF energy:  | -2167.840976 | a.u. |
| M05-2X enthalpy:    | -2166.874051 | a.u. |
| M05-2X free energy: | -2167.002388 | a.u. |

## Cartesian coordinates

| ATOM | X           | Y           | Z           |
|------|-------------|-------------|-------------|
| C    | -0.69131800 | 0.50820000  | 0.30435400  |
| H    | -1.22018300 | 0.36740100  | 1.24218700  |
| C    | 0.69184700  | 0.50803500  | 0.30412400  |
| H    | 1.22098000  | 0.36717100  | 1.24179600  |
| P    | -1.61199500 | 0.57976900  | -1.18280400 |
| P    | 1.61211400  | 0.57934000  | -1.18331000 |
| C    | -3.31054500 | 0.14854600  | -0.52151200 |
| C    | -5.68994700 | -0.33915300 | 0.92553300  |
| C    | -3.78528000 | -1.17649900 | -0.35923000 |
| C    | -4.11782700 | 1.24473000  | -0.09441100 |
| C    | -5.26429400 | 0.95586000  | 0.64724500  |
| C    | -4.95924600 | -1.38036600 | 0.37430500  |

|   |             |             |             |
|---|-------------|-------------|-------------|
| H | -5.86457500 | 1.76927400  | 1.02107000  |
| H | -5.30856600 | -2.38741200 | 0.52130800  |
| C | 3.31073600  | 0.14819600  | -0.52213900 |
| C | 5.68943800  | -0.33893200 | 0.92618300  |
| C | 3.78548500  | -1.17676300 | -0.35935400 |
| C | 4.11782600  | 1.24454700  | -0.09512300 |
| C | 5.26390400  | 0.95598800  | 0.64724800  |
| C | 4.95913400  | -1.38033400 | 0.37477400  |
| H | 5.86395300  | 1.76956400  | 1.02111100  |
| H | 5.30853700  | -2.38730200 | 0.52212100  |
| C | 3.11549300  | -2.42359700 | -0.97784200 |
| C | 6.94618600  | -0.55804300 | 1.76910800  |
| C | 3.86694700  | 2.73478800  | -0.45748300 |
| C | -3.11485800 | -2.42312800 | -0.97767600 |
| C | -3.86671000 | 2.73516600  | -0.45581700 |
| C | -6.94715200 | -0.55853900 | 1.76770600  |
| C | 1.81737400  | -2.78052100 | -0.23353000 |
| H | 1.09534000  | -1.97167000 | -0.23114100 |
| H | 2.04786900  | -3.02776200 | 0.80553100  |
| H | 1.35400100  | -3.65461800 | -0.69912600 |
| C | 2.88928100  | -2.21316900 | -2.48720300 |
| H | 2.30912200  | -1.32651300 | -2.72748400 |
| H | 2.36194800  | -3.07563500 | -2.90267000 |
| H | 3.85411800  | -2.12483600 | -2.99140200 |
| C | 4.00704300  | -3.67554100 | -0.88325700 |
| H | 4.98550900  | -3.51419100 | -1.33991500 |
| H | 3.51334400  | -4.48612000 | -1.42309300 |
| H | 4.14623400  | -4.00986700 | 0.14637800  |
| C | 7.25570500  | -2.04377800 | 1.97510400  |
| H | 7.45538300  | -2.54768500 | 1.02701500  |
| H | 6.43331300  | -2.55763000 | 2.47743900  |
| H | 8.14595000  | -2.14228700 | 2.59983400  |
| C | 8.15338600  | 0.09095500  | 1.07156800  |
| H | 8.30811900  | -0.34956600 | 0.08473400  |
| H | 9.05673900  | -0.06565300 | 1.66677900  |
| H | 8.01479800  | 1.16593300  | 0.94540400  |
| C | 6.74909900  | 0.08631400  | 3.15134700  |
| H | 6.56599700  | 1.15891100  | 3.07197000  |
| H | 7.64393300  | -0.06005600 | 3.76174100  |
| H | 5.89977900  | -0.36554200 | 3.66751500  |
| C | 5.04220900  | 3.62825700  | -0.01700400 |
| H | 5.99133400  | 3.29401700  | -0.44011400 |
| H | 5.13508200  | 3.68240300  | 1.06988800  |
| H | 4.85387400  | 4.64015600  | -0.37904200 |
| C | 3.78310900  | 2.89550700  | -1.98780100 |



|   |             |             |             |
|---|-------------|-------------|-------------|
| H | 4.70396300  | 2.53733100  | -2.45283200 |
| H | 3.66194400  | 3.95374000  | -2.23334400 |
| H | 2.94356700  | 2.35802500  | -2.42396100 |
| C | 2.61875800  | 3.33463200  | 0.22056100  |
| H | 1.68533000  | 2.97797500  | -0.20664400 |
| H | 2.63943000  | 4.42121700  | 0.10341800  |
| H | 2.61551900  | 3.10626500  | 1.28890400  |
| C | -4.00601200 | -3.67536600 | -0.88319400 |
| H | -4.14511600 | -4.00977800 | 0.14642800  |
| H | -3.51204000 | -4.48573200 | -1.42310300 |
| H | -4.98451700 | -3.51432900 | -1.33987100 |
| C | -1.81675300 | -2.77974600 | -0.23316600 |
| H | -2.04739000 | -3.02712400 | 0.80582900  |
| H | -1.09489600 | -1.97073600 | -0.23055800 |
| H | -1.35308900 | -3.65369900 | -0.69873300 |
| C | -2.88862600 | -2.21266100 | -2.48704900 |
| H | -2.31028200 | -1.32487000 | -2.72747700 |
| H | -3.85352400 | -2.12641600 | -2.99149900 |
| H | -2.35946000 | -3.07417800 | -2.90216100 |
| C | -6.75071700 | 0.08520200  | 3.15032800  |
| H | -6.56738300 | 1.15780000  | 3.07149100  |
| H | -5.90175500 | -0.36700900 | 3.66677200  |
| H | -7.64591400 | -0.06127200 | 3.76016500  |
| C | -8.15394800 | 0.09086000  | 1.06983800  |
| H | -8.01511100 | 1.16584300  | 0.94399900  |
| H | -9.05757100 | -0.06573200 | 1.66464100  |
| H | -8.30835800 | -0.34939000 | 0.08283100  |
| C | -7.25689800 | -2.04433900 | 1.97288500  |
| H | -6.43486400 | -2.55846300 | 2.47552500  |
| H | -7.45601700 | -2.54783000 | 1.02445700  |
| H | -8.14754300 | -2.14304600 | 2.59701600  |
| C | -3.78257800 | 2.89684100  | -1.98601800 |
| H | -4.70343300 | 2.53914900  | -2.45142000 |
| H | -2.94308500 | 2.35945900  | -2.42238300 |
| H | -3.66115800 | 3.95520400  | -2.23086700 |
| C | -5.04189100 | 3.62856500  | -0.01498000 |
| H | -5.99096400 | 3.29493000  | -0.43869000 |
| H | -4.85319100 | 4.64071400  | -0.37612600 |
| H | -5.13511400 | 3.68182800  | 1.07192000  |
| C | -2.61858900 | 3.33440000  | 0.22285800  |
| H | -2.61603000 | 3.10599100  | 1.29119500  |
| H | -2.63870200 | 4.42099900  | 0.10574400  |
| H | -1.68509800 | 2.97733300  | -0.20384300 |
| H | 0.45073300  | -0.68608000 | -1.83142900 |
| H | -0.45122600 | -0.68590600 | -1.83122300 |

**1-PR**

M05-2X SCF energy: -2167.899565 a.u.  
M05-2X enthalpy: -2166.927721 a.u.  
M05-2X free energy: -2167.05506 a.u.

## Cartesian coordinates

| ATOM | X           | Y           | Z           |
|------|-------------|-------------|-------------|
| C    | -0.64350500 | -0.11674500 | 0.27831000  |
| H    | -1.19651500 | 0.00644700  | 1.20580200  |
| C    | 0.66182800  | -0.39990000 | 0.30867200  |
| H    | 1.17742300  | -0.50409000 | 1.25961800  |
| P    | -1.59655000 | 0.16895400  | -1.27370200 |
| P    | 1.63775800  | -0.62156700 | -1.23712600 |
| C    | -3.32018800 | 0.06826400  | -0.56435500 |
| C    | -5.73655300 | 0.05212800  | 0.91304500  |
| C    | -4.03969800 | -1.14389000 | -0.38532900 |
| C    | -3.87831200 | 1.29421900  | -0.09357100 |
| C    | -5.05806400 | 1.23628100  | 0.64996200  |
| C    | -5.22536000 | -1.11060400 | 0.35777800  |
| H    | -5.47816100 | 2.14824600  | 1.04034200  |
| H    | -5.76496800 | -2.02702900 | 0.51695500  |
| C    | 3.34506400  | -0.35795000 | -0.53840900 |
| C    | 5.69492400  | 0.32436100  | 0.88519200  |
| C    | 4.11879700  | -1.37166000 | 0.08859600  |
| C    | 3.81980900  | 0.98694500  | -0.54769800 |
| C    | 4.96807700  | 1.28232600  | 0.18790400  |
| C    | 5.26920900  | -0.99143000 | 0.78986200  |
| H    | 5.32289700  | 2.29885600  | 0.22369100  |
| H    | 5.84981600  | -1.74925800 | 1.28473700  |
| C    | 3.82192800  | -2.89100400 | 0.01825300  |
| C    | 6.93053800  | 0.74338200  | 1.68245000  |
| C    | 3.19465100  | 2.14820700  | -1.37016400 |
| C    | -3.64107600 | -2.51138800 | -0.99358700 |
| C    | -3.30898600 | 2.71044000  | -0.39172500 |
| C    | -7.01207800 | 0.08065000  | 1.75557900  |
| C    | 2.56549900  | -3.27965400 | 0.82672600  |
| H    | 1.64431900  | -2.81676600 | 0.48872300  |
| H    | 2.71240900  | -3.00062500 | 1.87296400  |
| H    | 2.43099300  | -4.36367100 | 0.78371300  |
| C    | 3.77323200  | -3.35840200 | -1.45312600 |
| H    | 3.11794700  | -2.77427400 | -2.09214800 |
| H    | 3.45063800  | -4.40193500 | -1.49822000 |
| H    | 4.77652200  | -3.29521100 | -1.87999800 |

|   |             |             |             |
|---|-------------|-------------|-------------|
| C | 4.95012500  | -3.73725800 | 0.64276300  |
| H | 5.91657900  | -3.54203200 | 0.17498700  |
| H | 4.71076200  | -4.79047300 | 0.48269300  |
| H | 5.03781200  | -3.58164500 | 1.71977000  |
| C | 7.60682700  | -0.44354000 | 2.37554300  |
| H | 7.96033400  | -1.18221500 | 1.65285600  |
| H | 6.93061500  | -0.93660100 | 3.07736900  |
| H | 8.47150500  | -0.08568700 | 2.93832100  |
| C | 7.95599500  | 1.39333300  | 0.73869500  |
| H | 8.25579800  | 0.69306500  | -0.04338800 |
| H | 8.84586600  | 1.68697300  | 1.30130600  |
| H | 7.55179200  | 2.28561800  | 0.25821800  |
| C | 6.51808400  | 1.75654800  | 2.76310500  |
| H | 6.06888700  | 2.64962400  | 2.32614800  |
| H | 7.39436400  | 2.06545200  | 3.33886600  |
| H | 5.79280000  | 1.31273900  | 3.44789000  |
| C | 4.00820800  | 3.44875500  | -1.22849200 |
| H | 5.04599200  | 3.32360900  | -1.54328200 |
| H | 3.98844500  | 3.83741500  | -0.20773900 |
| H | 3.55697500  | 4.20189900  | -1.87613800 |
| C | 3.22699800  | 1.80364400  | -2.87180700 |
| H | 4.25679300  | 1.63340500  | -3.19341000 |
| H | 2.82235000  | 2.64345100  | -3.44291600 |
| H | 2.63608800  | 0.92264000  | -3.10937100 |
| C | 1.76191700  | 2.51250700  | -0.92631200 |
| H | 1.01389100  | 1.80852800  | -1.28418500 |
| H | 1.49956800  | 3.49072600  | -1.33760000 |
| H | 1.69454100  | 2.57180600  | 0.16232100  |
| C | -4.71072700 | -3.59635300 | -0.75283500 |
| H | -4.82195700 | -3.84169800 | 0.30493300  |
| H | -4.39129400 | -4.50494700 | -1.26725400 |
| H | -5.68356800 | -3.31063000 | -1.15664800 |
| C | -2.36452600 | -3.08844500 | -0.34456300 |
| H | -2.55582800 | -3.27329400 | 0.71508400  |
| H | -1.48974200 | -2.44994700 | -0.40718600 |
| H | -2.12326100 | -4.04532100 | -0.81518200 |
| C | -3.55926600 | -2.40483500 | -2.53273700 |
| H | -2.94241300 | -1.59034900 | -2.89952000 |
| H | -4.56398700 | -2.24902100 | -2.93149400 |
| H | -3.17097600 | -3.33868900 | -2.94746400 |
| C | -6.69116900 | 0.65441100  | 3.14563900  |
| H | -6.29902700 | 1.67055400  | 3.08077700  |
| H | -5.94865400 | 0.03608100  | 3.65388600  |
| H | -7.59717300 | 0.68065700  | 3.75641200  |
| C | -8.06240000 | 0.96814400  | 1.06731900  |

|   |             |             |             |
|---|-------------|-------------|-------------|
| H | -7.70911000 | 1.99404600  | 0.95228600  |
| H | -8.97881500 | 0.99115400  | 1.66263300  |
| H | -8.30278800 | 0.57911400  | 0.07598900  |
| C | -7.61644500 | -1.31431800 | 1.94487500  |
| H | -6.91801500 | -1.98853400 | 2.44556800  |
| H | -7.90854000 | -1.75934000 | 0.99107900  |
| H | -8.51198600 | -1.23711000 | 2.56492500  |
| C | -3.25889000 | 2.95565200  | -1.91268000 |
| H | -4.25934400 | 2.85181500  | -2.33819900 |
| H | -2.58785500 | 2.27230900  | -2.42624600 |
| H | -2.90993600 | 3.97451000  | -2.10125100 |
| C | -4.21853300 | 3.82045800  | 0.16905500  |
| H | -5.23004700 | 3.76710000  | -0.23786000 |
| H | -3.79606800 | 4.78357100  | -0.12155300 |
| H | -4.27075100 | 3.80072000  | 1.25988900  |
| C | -1.93003600 | 2.95616600  | 0.25270800  |
| H | -1.95660200 | 2.70721400  | 1.31631800  |
| H | -1.67656400 | 4.01547500  | 0.15900900  |
| H | -1.12593500 | 2.39459800  | -0.21502100 |
| H | 1.57655700  | -2.02645300 | -1.25697500 |
| H | -1.45492400 | -1.12004900 | -1.81126100 |

## 2

|                     |              |      |
|---------------------|--------------|------|
| M05-2X SCF energy:  | -2105.094118 | a.u. |
| M05-2X enthalpy:    | -2105.061385 | a.u. |
| M05-2X free energy: | -2105.105471 | a.u. |

### Cartesian coordinates

| ATOM | X           | Y          | Z          |
|------|-------------|------------|------------|
| S    | 0.18878800  | 1.19409100 | 0.52360100 |
| C    | 1.44288600  | 1.32017600 | 1.74403700 |
| S    | 0.82710900  | 1.54852800 | 3.37034900 |
| C    | -0.88862900 | 1.55466200 | 3.01504800 |
| C    | -1.21650000 | 1.36274300 | 1.55656300 |
| S    | 3.02582300  | 1.23167600 | 1.40004700 |
| S    | -2.71665000 | 1.30918600 | 0.94777600 |
| S    | -1.98724500 | 1.75417600 | 4.18938400 |

## 2-TS

|                     |              |      |
|---------------------|--------------|------|
| M05-2X SCF energy:  | -2106.233339 | a.u. |
| M05-2X enthalpy:    | -2106.187543 | a.u. |
| M05-2X free energy: | -2106.231311 | a.u. |

Cartesian coordinates

| ATOM | X | Y           | Z           |             |
|------|---|-------------|-------------|-------------|
| S    |   | -0.74036700 | -1.46180800 | -0.00404800 |
| C    |   | -1.70761800 | -0.00000100 | 0.01306800  |
| S    |   | -0.74036700 | 1.46180800  | -0.00405600 |
| C    |   | 0.83490700  | 0.70817400  | -0.19017300 |
| C    |   | 0.83490800  | -0.70817400 | -0.19017300 |
| S    |   | -3.33530800 | 0.00000000  | 0.05379500  |
| H    |   | 2.86352400  | 0.44067700  | 1.21214300  |
| H    |   | 2.86355500  | -0.44068700 | 1.21217500  |
| S    |   | 2.23613700  | 1.60654400  | -0.02973700 |
| S    |   | 2.23613800  | -1.60654300 | -0.02974500 |

**3**

|                     |              |      |
|---------------------|--------------|------|
| M05-2X SCF energy:  | -6107.431668 | a.u. |
| M05-2X enthalpy:    | -6107.399795 | a.u. |
| M05-2X free energy: | -6107.446279 | a.u. |

Cartesian coordinates

| ATOM | X | Y           | Z          |            |
|------|---|-------------|------------|------------|
| S    |   | 0.20353700  | 1.18057000 | 0.52676100 |
| C    |   | 1.46574900  | 1.31803600 | 1.73901100 |
| S    |   | 0.84088900  | 1.55487800 | 3.36175800 |
| C    |   | -0.86056700 | 1.55119700 | 2.99823100 |
| C    |   | -1.18321100 | 1.36073500 | 1.56081400 |
| S    |   | 3.04884500  | 1.23443300 | 1.39443100 |
| Se   |   | -2.80184100 | 1.31418400 | 0.88157700 |
| Se   |   | -2.03781800 | 1.76120600 | 4.28422200 |

**3-TS**

|                     |                |      |
|---------------------|----------------|------|
| M05-2X SCF energy:  | -6108.59173424 | a.u. |
| M05-2X enthalpy:    | -6108.545617   | a.u. |
| M05-2X free energy: | -6108.591939   | a.u. |

Cartesian coordinates

| ATOM | X | Y           | Z           |             |
|------|---|-------------|-------------|-------------|
| S    |   | 1.37585800  | 1.46000300  | -0.00537800 |
| C    |   | 2.34799600  | 0.00000600  | 0.01117300  |
| S    |   | 1.37587700  | -1.46000000 | -0.00545700 |
| C    |   | -0.18920500 | -0.70510800 | -0.18256700 |
| C    |   | -0.18921100 | 0.70508900  | -0.18257600 |
| S    |   | 3.97540000  | 0.00001200  | 0.05645000  |
| Se   |   | -1.69039900 | 1.68379400  | -0.02054800 |

|    |             |             |             |
|----|-------------|-------------|-------------|
| Se | -1.69039300 | -1.68381600 | -0.02050000 |
| H  | -2.25229300 | -0.42582400 | 1.39468300  |
| H  | -2.25239800 | 0.42639700  | 1.39491700  |

**HC≡N<sup>+</sup>-CH<sub>2</sub><sup>-</sup>**

|                     |                |      |
|---------------------|----------------|------|
| M05-2X SCF energy:  | -133.819519837 | a.u. |
| M05-2X enthalpy:    | -133.7561358   | a.u. |
| M05-2X free energy: | -133.7853688   | a.u. |

Cartesian coordinates

| ATOM | X           | Y           | Z           |
|------|-------------|-------------|-------------|
| C    | -1.20492100 | 0.11074900  | 0.00000100  |
| N    | -0.12233400 | -0.45050500 | 0.00000500  |
| H    | -0.38765300 | 1.62923300  | 0.00001700  |
| H    | 0.48599900  | 1.58531400  | 0.00002100  |
| H    | -2.17653100 | -0.37134300 | -0.00002500 |
| C    | 1.13214800  | -0.01948900 | -0.00000300 |
| H    | 1.68559900  | -0.11864500 | 0.92539000  |
| H    | 1.68555900  | -0.11858100 | -0.92542700 |

**HC≡N<sup>+</sup>-NH<sup>-</sup>**

|                     |                |      |
|---------------------|----------------|------|
| M05-2X SCF energy:  | -149.848847633 | a.u. |
| M05-2X enthalpy:    | -149.7970036   | a.u. |
| M05-2X free energy: | -149.8258566   | a.u. |

Cartesian coordinates

| ATOM | X           | Y           | Z           |
|------|-------------|-------------|-------------|
| C    | -1.15312500 | 0.06527100  | 0.05549500  |
| N    | -0.06106800 | -0.45437500 | 0.00986200  |
| H    | -0.42018100 | 1.59718900  | 0.08656900  |
| H    | 0.45351000  | 1.49741500  | 0.03475200  |
| H    | -2.15217300 | -0.24712300 | -0.19162700 |
| N    | 1.10297200  | 0.04020100  | -0.12807900 |
| H    | 1.74426200  | -0.33988800 | 0.56484800  |

**HC≡N<sup>+</sup>-O<sup>-</sup>**

|                     |                |      |
|---------------------|----------------|------|
| M05-2X SCF energy:  | -169.710826434 | a.u. |
| M05-2X enthalpy:    | -169.6713114   | a.u. |
| M05-2X free energy: | -169.6997714   | a.u. |

Cartesian coordinates

| ATOM | X          | Y           | Z          |
|------|------------|-------------|------------|
| C    | 1.10703900 | -0.00234400 | 0.00000000 |

|   |             |             |            |
|---|-------------|-------------|------------|
| N | 0.00000000  | 0.47129600  | 0.00000000 |
| O | -1.10528200 | -0.07552000 | 0.00000000 |
| H | 0.46957300  | -1.52244700 | 0.00000000 |
| H | -0.41245600 | -1.43064300 | 0.00000000 |
| H | 2.14290600  | 0.27224300  | 0.00000000 |

**N≡N<sup>+</sup>-CH<sub>2</sub><sup>-</sup>**

|                     |                |      |
|---------------------|----------------|------|
| M05-2X SCF energy:  | -149.873414597 | a.u. |
| M05-2X enthalpy:    | -149.8215256   | a.u. |
| M05-2X free energy: | -149.8503316   | a.u. |

Cartesian coordinates

| ATOM | X           | Y           | Z           |
|------|-------------|-------------|-------------|
| N    | -0.16825900 | -0.46295800 | 0.00000500  |
| H    | -0.55089100 | 1.51745600  | 0.00001100  |
| H    | 0.37740300  | 1.45963900  | 0.00002400  |
| N    | -1.21238000 | 0.02477000  | -0.00000300 |
| C    | 1.09275300  | 0.06022700  | 0.00000000  |
| H    | 1.64069700  | -0.13554500 | -0.91544600 |
| H    | 1.64074700  | -0.13559200 | 0.91540500  |

**N≡N<sup>+</sup>-NH<sup>-</sup>**

|                     |                |      |
|---------------------|----------------|------|
| M05-2X SCF energy:  | -165.912643538 | a.u. |
| M05-2X enthalpy:    | -165.8719335   | a.u. |
| M05-2X free energy: | -165.9004085   | a.u. |

Cartesian coordinates

| ATOM | X           | Y           | Z           |
|------|-------------|-------------|-------------|
| N    | 0.10002800  | -0.46592400 | -0.00012500 |
| H    | 0.57957100  | 1.44359100  | 0.08538100  |
| H    | -0.35902200 | 1.40966600  | 0.06930300  |
| N    | 1.15800200  | 0.01040700  | 0.00919700  |
| N    | -1.03674400 | 0.09840100  | -0.09457900 |
| H    | -1.76955300 | -0.35344100 | 0.44386700  |

**N≡N<sup>+</sup>-O<sup>-</sup>**

|                     |                |      |
|---------------------|----------------|------|
| M05-2X SCF energy:  | -185.776055461 | a.u. |
| M05-2X enthalpy:    | -185.7471635   | a.u. |
| M05-2X free energy: | -185.7750595   | a.u. |

Cartesian coordinates

| ATOM | X | Y | Z |
|------|---|---|---|
|------|---|---|---|

|   |             |             |            |
|---|-------------|-------------|------------|
| N | 0.00000000  | 0.47648600  | 0.00000000 |
| O | -1.02996600 | -0.19708900 | 0.00000000 |
| H | 0.71399700  | -1.31418800 | 0.00000000 |
| H | -0.22480000 | -1.38228400 | 0.00000000 |
| N | 1.10721800  | 0.13396900  | 0.00000000 |

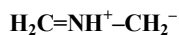

|                     |                |      |
|---------------------|----------------|------|
| M05-2X SCF energy:  | -135.053618324 | a.u. |
| M05-2X enthalpy:    | -134.9642083   | a.u. |
| M05-2X free energy: | -134.9937183   | a.u. |

Cartesian coordinates

| ATOM | X           | Y           | Z           |             |
|------|-------------|-------------|-------------|-------------|
| N    |             | 0.00000000  | -0.54741300 | -0.02894300 |
| C    | -1.16638900 | 0.14002100  | -0.07528900 |             |
| H    | -1.25349900 | 0.88333500  | -0.85439400 |             |
| H    | -2.06266700 | -0.40778000 | 0.17635800  |             |
| H    | 0.00000000  | -1.36343100 | 0.56231300  |             |
| C    | 1.16638900  | 0.14002100  | -0.07528900 |             |
| H    | 2.06266600  | -0.40778000 | 0.17636100  |             |
| H    | 1.25350100  | 0.88333300  | -0.85439600 |             |
| H    | 0.45002800  | 1.28198600  | 0.94990700  |             |
| H    | -0.45003000 | 1.28198400  | 0.94991100  |             |

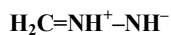

|                     |                |      |
|---------------------|----------------|------|
| M05-2X SCF energy:  | -151.080263606 | a.u. |
| M05-2X enthalpy:    | -151.0021216   | a.u. |
| M05-2X free energy: | -151.0312366   | a.u. |

Cartesian coordinates

| ATOM | X           | Y           | Z           |             |
|------|-------------|-------------|-------------|-------------|
| N    |             | 0.02405800  | -0.54764300 | -0.01211600 |
| C    | -1.12569000 | 0.12635000  | -0.07997900 |             |
| H    | -1.21548900 | 0.84501400  | -0.87853700 |             |
| H    | -2.01551400 | -0.36613500 | 0.28246400  |             |
| H    | 0.05179900  | -1.28437800 | 0.68190300  |             |
| N    | 1.10255600  | 0.22310800  | -0.17823100 |             |
| H    | 1.91781500  | -0.28400600 | 0.15306800  |             |
| H    | -0.39147700 | 1.34999500  | 0.88719500  |             |
| H    | 0.52071300  | 1.25315100  | 0.68620600  |             |

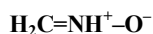



M05-2X SCF energy: -170.945242683 a.u.  
M05-2X enthalpy: -170.8794637 a.u.  
M05-2X free energy: -170.9082737 a.u.

Cartesian coordinates

| ATOM | X           | Y           | Z           |             |
|------|-------------|-------------|-------------|-------------|
| N    |             | 0.03564900  | -0.56057400 | -0.01703600 |
| C    | -1.07924200 | 0.15364600  | -0.08082900 |             |
| H    | -1.14614200 | 0.88689000  | -0.86816500 |             |
| H    | -1.98952800 | -0.29787900 | 0.29106000  |             |
| H    | 0.07138900  | -1.30563600 | 0.67016200  |             |
| O    | 1.12337300  | 0.15127900  | -0.12157900 |             |
| H    | 0.59850000  | 1.15586600  | 0.61292100  |             |
| H    | -0.29529700 | 1.35266700  | 0.87087600  |             |

**HN=NH<sup>+</sup>-NH<sup>-</sup>**

M05-2X SCF energy: -167.094425877 a.u.  
M05-2X enthalpy: -167.0277419 a.u.  
M05-2X free energy: -167.0564909 a.u.

Cartesian coordinates

| ATOM | X           | Y           | Z           |            |
|------|-------------|-------------|-------------|------------|
| N    |             | 0.00000000  | -0.52611400 | 0.00496300 |
| H    |             | 0.00000000  | -1.17786000 | 0.78698500 |
| N    | 1.07964500  | 0.19732800  | -0.18300100 |            |
| H    | -0.48620100 | 1.32421100  | 0.60325700  |            |
| H    | 0.48620100  | 1.32421100  | 0.60325600  |            |
| N    | -1.07964500 | 0.19732800  | -0.18300100 |            |
| H    | -1.86154900 | -0.27517900 | 0.26688800  |            |
| H    | 1.86154900  | -0.27517900 | 0.26688800  |            |

**HN=NH<sup>+</sup>-O<sup>-</sup>**

M05-2X SCF energy: -186.95425241 a.u.  
M05-2X enthalpy: -186.9004124 a.u.  
M05-2X free energy: -186.9289134 a.u.

Cartesian coordinates

| ATOM | X           | Y           | Z           |            |
|------|-------------|-------------|-------------|------------|
| N    |             | 0.00713100  | -0.53206000 | 0.01030800 |
| H    | -0.00582200 | -1.17987900 | 0.79924700  |            |
| H    | -0.37559400 | 1.35217500  | 0.59727600  |            |
| H    | 0.59824900  | 1.21450400  | 0.52924900  |            |
| N    | -1.02980100 | 0.22650800  | -0.19280600 |            |

|   |             |             |             |
|---|-------------|-------------|-------------|
| O | 1.09731600  | 0.11993400  | -0.11369800 |
| H | -1.83666900 | -0.20740800 | 0.26129700  |

**O=NH<sup>+</sup>-O<sup>-</sup>**

|                     |                |      |
|---------------------|----------------|------|
| M05-2X SCF energy:  | -206.809260375 | a.u. |
| M05-2X enthalpy:    | -206.7681574   | a.u. |
| M05-2X free energy: | -206.7964704   | a.u. |

Cartesian coordinates

| ATOM | X           | Y           | Z           |
|------|-------------|-------------|-------------|
| N    | -0.00000300 | -0.53274700 | 0.01893100  |
| H    | -0.00001200 | -1.17335700 | 0.81775100  |
| H    | -0.49788100 | 1.25351900  | 0.53148800  |
| H    | 0.49788200  | 1.25350500  | 0.53150200  |
| O    | 1.04956900  | 0.14972100  | -0.12581700 |
| O    | -1.04956500 | 0.14972400  | -0.12584000 |

**H<sub>2</sub>C=O<sup>+</sup>-CH<sub>2</sub><sup>-</sup>**

|                     |                |      |
|---------------------|----------------|------|
| M05-2X SCF energy:  | -154.895213507 | a.u. |
| M05-2X enthalpy:    | -154.8190835   | a.u. |
| M05-2X free energy: | -154.8490105   | a.u. |

Cartesian coordinates

| ATOM | X           | Y           | Z           |
|------|-------------|-------------|-------------|
| C    | 1.15315400  | 0.02386500  | 0.13072300  |
| H    | 1.21130300  | 0.63030700  | 1.02254100  |
| H    | 2.00363200  | -0.49589800 | -0.27283800 |
| C    | -1.15315400 | 0.02386500  | 0.13072300  |
| H    | -2.00363200 | -0.49589800 | -0.27283800 |
| H    | -1.21130300 | 0.63030700  | 1.02254100  |
| H    | -0.39357700 | 1.66820600  | -0.71694500 |
| H    | 0.39357700  | 1.66820600  | -0.71694500 |
| O    | 0.00000000  | -0.48645200 | -0.20427500 |

**H<sub>2</sub>C=O<sup>+</sup>-NH<sup>-</sup>**

|                     |                |      |
|---------------------|----------------|------|
| M05-2X SCF energy:  | -170.908658751 | a.u. |
| M05-2X enthalpy:    | -170.8432398   | a.u. |
| M05-2X free energy: | -170.8722738   | a.u. |

Cartesian coordinates

| ATOM | X          | Y          | Z          |
|------|------------|------------|------------|
| C    | 1.09095400 | 0.07036600 | 0.10915200 |

|   |             |             |             |
|---|-------------|-------------|-------------|
| H | 1.12568400  | 0.70475200  | 0.98295700  |
| H | 1.97530400  | -0.39060700 | -0.30275500 |
| H | -0.42812200 | 1.40462700  | -0.55746700 |
| H | 0.39441800  | 1.50793600  | -0.73013100 |
| O | -0.00750100 | -0.54384200 | -0.16230500 |
| N | -1.10107600 | 0.15099900  | 0.21593300  |
| H | -1.84546800 | -0.35515800 | -0.26060400 |

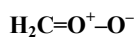

|                     |                |      |
|---------------------|----------------|------|
| M05-2X SCF energy:  | -190.751239536 | a.u. |
| M05-2X enthalpy:    | -190.6989225   | a.u. |
| M05-2X free energy: | -190.7277375   | a.u. |

Cartesian coordinates

| ATOM | X           | Y           | Z           |
|------|-------------|-------------|-------------|
| C    | 1.02830200  | 0.11845100  | 0.12875700  |
| H    | 0.98809300  | 0.76825600  | 0.99114400  |
| H    | 1.96502500  | -0.24518600 | -0.27431400 |
| H    | -0.49710900 | 1.27721700  | -0.53926400 |
| H    | 0.30404800  | 1.49474400  | -0.74398200 |
| O    | 0.00880500  | -0.58807700 | -0.16630100 |
| O    | -1.12503900 | 0.08736000  | 0.14053600  |

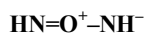

|                     |                |      |
|---------------------|----------------|------|
| M05-2X SCF energy:  | -186.902213137 | a.u. |
| M05-2X enthalpy:    | -186.8491341   | a.u. |
| M05-2X free energy: | -186.8777941   | a.u. |

Cartesian coordinates

| ATOM | X           | Y           | Z           |
|------|-------------|-------------|-------------|
| N    | 1.06877700  | 0.13775200  | -0.20909000 |
| H    | 1.80360600  | -0.31887500 | 0.33681300  |
| H    | -0.44135600 | 1.43765900  | 0.45743900  |
| H    | 0.44138200  | 1.43763300  | 0.45741200  |
| N    | -1.06877800 | 0.13775600  | -0.20909000 |
| O    | -0.00000200 | -0.52076300 | 0.16734800  |
| H    | -1.80361000 | -0.31887100 | 0.33681000  |

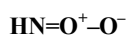

|                     |                |      |
|---------------------|----------------|------|
| M05-2X SCF energy:  | -206.734902001 | a.u. |
| M05-2X enthalpy:    | -206.695219    | a.u. |
| M05-2X free energy: | -206.723697    | a.u. |

Cartesian coordinates

| ATOM | X | Y           | Z           |             |
|------|---|-------------|-------------|-------------|
| H    |   | -0.31975200 | 1.47557500  | 0.45569000  |
| H    |   | 0.55263700  | 1.31970100  | 0.41432400  |
| N    |   | -1.00490800 | 0.17745800  | -0.23071300 |
| O    |   | -0.01919700 | -0.53755000 | 0.18761400  |
| O    |   | 1.09409200  | 0.05969100  | -0.13124700 |
| H    |   | -1.79768200 | -0.21460700 | 0.29404300  |

**O=O<sup>+</sup>-O<sup>-</sup>**

|                     |                |      |
|---------------------|----------------|------|
| M05-2X SCF energy:  | -226.558842155 | a.u. |
| M05-2X enthalpy:    | -226.5324472   | a.u. |
| M05-2X free energy: | -226.5607972   | a.u. |

Cartesian coordinates

| ATOM | X | Y           | Z           |             |
|------|---|-------------|-------------|-------------|
| H    |   | -0.44394800 | 1.37400500  | 0.41857000  |
| H    |   | 0.44394900  | 1.37400300  | 0.41857000  |
| O    |   | 0.00000000  | -0.54489500 | 0.20638700  |
| O    |   | 1.03648700  | 0.10069700  | -0.15551500 |
| O    |   | -1.03648700 | 0.10069700  | -0.15551500 |

**H<sub>2</sub>C=S<sup>+</sup>-CH<sub>2</sub><sup>-</sup>**

|                     |                |      |
|---------------------|----------------|------|
| M05-2X SCF energy:  | -477.871091867 | a.u. |
| M05-2X enthalpy:    | -477.7986729   | a.u. |
| M05-2X free energy: | -477.8294829   | a.u. |

Cartesian coordinates

| ATOM | X | Y           | Z           |             |
|------|---|-------------|-------------|-------------|
| C    |   | -1.29852000 | 0.41257300  | -0.08562900 |
| H    |   | -1.27659800 | 1.17328600  | -0.85326100 |
| H    |   | -2.26476700 | -0.02312200 | 0.13034100  |
| C    |   | 1.29852100  | 0.41257300  | -0.08562900 |
| H    |   | 2.26476600  | -0.02312300 | 0.13034200  |
| H    |   | 1.27659900  | 1.17328500  | -0.85326300 |
| H    |   | 0.43016000  | 1.55267500  | 0.91665000  |
| H    |   | -0.43016000 | 1.55267600  | 0.91665300  |
| S    |   | 0.00000000  | -0.64728500 | 0.04000500  |

**H<sub>2</sub>C=S<sup>+</sup>-NH<sup>-</sup>**

|                    |                |      |
|--------------------|----------------|------|
| M05-2X SCF energy: | -493.909250336 | a.u. |
|--------------------|----------------|------|

M05-2X enthalpy: -493.8486383 a.u.  
M05-2X free energy: -493.8790593 a.u.

Cartesian coordinates

| ATOM | X           | Y           | Z           |
|------|-------------|-------------|-------------|
| C    | -1.27203000 | 0.36281300  | -0.09602100 |
| H    | -1.25511700 | 1.11572100  | -0.86937800 |
| H    | -2.22899500 | -0.04768800 | 0.19682200  |
| H    | 0.42137800  | 1.51465500  | 0.68459400  |
| H    | -0.46101400 | 1.56717800  | 0.87434400  |
| N    | 1.17516700  | 0.52836800  | -0.18219800 |
| H    | 2.08680700  | 0.16179300  | 0.08713900  |
| S    | 0.05268500  | -0.63669500 | 0.05487400  |

**H<sub>2</sub>C=S<sup>+</sup>-O<sup>-</sup>**

M05-2X SCF energy: -513.785072938 a.u.  
M05-2X enthalpy: -513.7365459 a.u.  
M05-2X free energy: -513.7666289 a.u.

Cartesian coordinates

| ATOM | X           | Y           | Z           |
|------|-------------|-------------|-------------|
| C    | -1.25357000 | 0.32039700  | -0.09288100 |
| H    | -1.28041400 | 1.07708400  | -0.86229100 |
| H    | -2.20033400 | -0.09401800 | 0.23520500  |
| H    | 0.42315100  | 1.44732200  | 0.60485500  |
| H    | -0.46758400 | 1.54561200  | 0.84687800  |
| S    | 0.11136100  | -0.62833600 | 0.04988600  |
| O    | 1.15810300  | 0.51937300  | -0.13319300 |

**HN=S<sup>+</sup>-NH<sup>-</sup>**

M05-2X SCF energy: -509.933713009 a.u.  
M05-2X enthalpy: -509.884789 a.u.  
M05-2X free energy: -509.9148 a.u.

Cartesian coordinates

| ATOM | X           | Y           | Z           |
|------|-------------|-------------|-------------|
| H    | -2.05858700 | 0.08255600  | 0.16675600  |
| H    | 0.47628500  | 1.54226300  | 0.61863000  |
| H    | -0.47631300 | 1.54224500  | 0.61860600  |
| N    | 1.18116900  | 0.46277900  | -0.19282700 |
| H    | 2.05858700  | 0.08256800  | 0.16675000  |
| S    | 0.00000400  | -0.60803000 | 0.07055200  |
| N    | -1.18117400 | 0.46277100  | -0.19282800 |

**HN=S<sup>+</sup>-O<sup>-</sup>**

M05-2X SCF energy: -529.804648485 a.u.  
M05-2X enthalpy: -529.7683725 a.u.  
M05-2X free energy: -529.7981615 a.u.

## Cartesian coordinates

| ATOM | X | Y           | Z           |             |
|------|---|-------------|-------------|-------------|
| H    |   | -2.03882800 | 0.06103300  | 0.18149500  |
| H    |   | 0.51454200  | 1.46774200  | 0.54974000  |
| H    |   | -0.46729500 | 1.53131800  | 0.60246100  |
| S    |   | 0.04860500  | -0.59949500 | 0.07007100  |
| N    |   | -1.16173100 | 0.43408100  | -0.19510000 |
| O    |   | 1.16825300  | 0.43665700  | -0.13614000 |

**O=S<sup>+</sup>-O<sup>-</sup>**

M05-2X SCF energy: -549.67193136 a.u.  
M05-2X enthalpy: -549.6483814 a.u.  
M05-2X free energy: -549.6780684 a.u.

## Cartesian coordinates

| ATOM | X | Y           | Z           |             |
|------|---|-------------|-------------|-------------|
| H    |   | 0.51505700  | 1.45982800  | 0.54241100  |
| H    |   | -0.51501700 | 1.45984700  | 0.54241700  |
| S    |   | -0.00000100 | -0.58855900 | 0.07183200  |
| O    |   | 1.14818900  | 0.40607600  | -0.13963500 |
| O    |   | -1.14819200 | 0.40608200  | -0.13963200 |
